# Supplementary material for: Impact of the Uncoupling Protein 1 on Cardiovascular Risk in Patients with Rheumatoid Arthritis
Source: MDPI journal article supplement (doi:10.3390/cells10051131), 2021-05-07
Supplement: s1 [file s1]

Supplementary Material

# Impact of the Uncoupling Protein 1 on Cardiovascular Risk in Patients with Rheumatoid Arthritis

Lovisa I. Lyngfelt <sup>1,\*</sup>, Malin C. Erlandsson <sup>1,2</sup>, Mitra Nadali <sup>1,2</sup>, Shahram Hedjazifar <sup>3</sup>, Rille Pullerits <sup>1,2,4</sup>, Karin M. Andersson <sup>1</sup>, Petra Brembeck <sup>3</sup>, Sofia Töyrä Silfverswärd <sup>1</sup>, Ulf Smith <sup>3</sup> and Maria I. Bokarewa <sup>1,2</sup>

- <sup>1</sup> Department of Rheumatology and Inflammation Research, Institute of Medicine, University of Gothenburg, 405 30 Gothenburg, Sweden; malin.erlandsson@rheuma.gu.se (M.C.E.); mitra.nadali@vgregion.se (M.N.); rille.pullerits@rheuma.gu.se (R.P.); karin.andersson@rheuma.gu.se (K.M.A.); sofia.silfversward@rheuma.gu.se (S.T.S.); maria.bokarewa@rheuma.gu.se (M.I.B.)
- <sup>2</sup> Rheumatology Clinic, Sahlgrenska University Hospital, 413 45 Gothenburg, Sweden
- <sup>3</sup> Lundberg Laboratory for Diabetes Research, Department of Molecular and Clinical Medicine, Institute of Medicine, University of Gothenburg, 405 30 Gothenburg, Sweden; shahram.hedjazifar@astrazeneca.com (S.H.); petra.brembeck@gu.se (P.B.); ulf.smith@gu.se (U.S.)
- <sup>4</sup> Department of Clinical Immunology and Transfusion Medicine, Sahlgrenska University Hospital, 413 45 Gothenburg, Sweden
- \* Correspondence: lovisa.lyngfelt@gu.se; Tel.: +46737198781

**Table S1.** Primer pair sequences.

**S1A** Assay on pre primed plate from SA Biosciences (Qiagen).

|        | Cat.nr. (SABioscience, Qiagen) |
|--------|--------------------------------|
| RETN   | PPH02309B                      |
| STAT3  | PPH00708F                      |
| ACTB   | PPH00073G                      |
| POLR2A | PPH13508E                      |

**S1B** Individual primer sequences

|           |                              |
|-----------|------------------------------|
| UCP1 F2   | CTGGAATAGCGGCGTGCTT          |
| UCP1 R2   | AATAACACTGGACGTCGGGC         |
| ABCA1 F1  | GAGTGAAGCCTGTCATCTACTGG      |
| ABCA1 R1  | GGAGGACACATAGGACTTCTGC       |
| Leptin F1 | TGTCACCAGGATCAATGACA         |
| Leptin R1 | CCAGGAATGAAGTCCAAACC         |
| ACTB      | Tataa Biocenter qA-01-010455 |
